1 **Time to budbreak is not enough: cold hardiness evaluation is necessary in dormancy and**  
2 **spring phenology studies**

3

4 Michael G. North<sup>1</sup>, Al P. Kovaleski<sup>1</sup>

5

6 <sup>1</sup>Department of Horticulture, University of Wisconsin–Madison, Madison, WI, USA 53706

7

8 Author for correspondence:

9 A. P. Kovaleski

10 Email: [al.kovaleski@wisc.edu](mailto:al.kovaleski@wisc.edu)

11

12 Word count:

13 Total – 4069

14 Summary – 189

15 Main text – 2928

16 Box 1 – 952

17

18 SI Materials and Methods – 901

19

20 Key words: budbreak, chilling, cold hardiness, dormancy, forcing, spring phenology

21

22 Number of Figures in color: 3

23 Number of Box Figures in color: 1

24

25 Supporting information: Materials and Methods (including data availability statement)

26

## 27 **Summary**

28 Dormancy of buds is an important phase in the life cycle of perennial plants growing in  
29 environments where unsuitable growth conditions occur seasonally. In regions where low  
30 temperature defines these unsuitable conditions, the attainment of cold hardiness is also required  
31 to survive. The end of the dormant period culminates in budbreak and flower emergence, or  
32 spring phenology, one of the most appreciated and studied phenological events. Despite this, we  
33 have a limited physiological and molecular understanding of dormancy, which has negatively  
34 affected our ability to model budbreak. Here we highlight the importance of including cold  
35 hardiness in studies that typically only characterize time to budbreak. We show how different  
36 temperature treatments may lead to increases in cold hardiness, and by doing so also  
37 (inadvertently) increase time to budbreak. Therefore, erroneous interpretations of data may occur  
38 by not phenotyping cold hardiness. Changes in cold hardiness were very likely present in  
39 previous experiments to study dormancy, especially when those included below freezing  
40 temperature treatments. Separating the effects between chilling accumulation and cold  
41 acclimation in future studies will be essential for increasing our understanding of dormancy and  
42 spring phenology in plants.

43

## 44 **Main text**

45 Dormancy, along with development of cold hardiness in tissues, allows plants to survive  
46 unsuitable growing conditions during winter and precisely time budbreak upon return of suitable  
47 temperatures in spring. Chilling accumulation – the exposure to low temperatures for a period of  
48 time – promotes the transition from the warm temperature non-responsive phase to the warm  
49 temperature-responsive phase due to ontogenetic changes within buds (often referred to as endo-  
50 to ecodormancy transition – see Lang et al., 1987 for definitions). The molecular and  
51 physiological basis for dormancy and its transitions remain only partially understood (Cooke et  
52 al., 2012; Yamane et al., 2021). In turn modeling chilling accumulation across different regions  
53 (Luedeling and Brown, 2011) and modeling time to budbreak in spring (spring phenology)  
54 (Melaas et al., 2016; Wang et al., 2020; Zohner et al., 2020) present a linked challenge.

55

56 Here we show that the phenotype of time to budbreak, which has been used in the vast majority  
57 of experiments for over a century, only tells part of the story. This shortcoming has limited

58 advances in our understanding of dormancy from a mechanistic standpoint, and related aspects  
59 such as the development of accurate chilling accumulation and spring phenology models, which  
60 is an important component of Earth system models (Richardson et al., 2012; Chen et al., 2016).  
61 We argue that evaluation of cold hardiness and deacclimation is necessary to accurately interpret  
62 budbreak as a phenotype for dormancy completion. To do so, we present here a combination of  
63 original data along with re-analysis of previously published data from Kovaleski (2022).

64  
65 The first presumed report of low temperature exposure (chilling) as a requirement for proper  
66 budbreak of temperate species once exposed to warm temperatures (forcing) is over two  
67 centuries old (Knight, 1801). Chilling-forcing experiments have been the standard approach to  
68 study dormancy for at least 100 years (Coville, 1920). In these experiments, plants or cuttings are  
69 subjected to low temperatures for varying durations (chilling treatments), either naturally (field)  
70 or artificially (low temperature chambers), and then transferred to forcing conditions to monitor  
71 regrowth. The typical metrics recorded in these assays are based on visual observation of percent  
72 budbreak and/or time to budbreak (Londo and Johnson, 2014; Alvarez et al., 2018). Longer  
73 duration of chilling treatments correlates with higher percent budbreak and shorter time to  
74 budbreak (i.e., negative correlation between chilling accumulation and heat requirement under  
75 forcing). However, in most studies the temperature treatments applied as chilling are also  
76 inadvertently affecting other physiological aspects in the buds beyond dormancy progression,  
77 including cold hardiness.

78  
79 While artificial chilling treatments are often described as constant, positive temperatures (e.g.,  
80 1.5 °C and 4 °C within Flynn and Wolkovich (2018)), more and more studies have included  
81 negative temperatures to study their effect on chilling accumulation (−3 °C, −5 °C and −8 °C in  
82 Cragin et al., 2017; −2 °C in Baumgarten et al., 2020). However, these experiments have not  
83 included evaluations of cold hardiness in response to chilling. The combined effects of chilling  
84 and cold hardiness on time to budbreak have only been studied in field conditions, although this  
85 has now been done in many species, both of fruit crops, such as grapevines (Kovaleski et al.,  
86 2018; Kovaleski 2022; North et al., 2022) and apricot (Kovaleski, 2022), and other ornamental  
87 and forest species (Lenz et al., 2013; Vitra et al., 2017; Kovaleski, 2022). However, artificial

88 chilling experiments are key to better understand effects of particular temperatures in providing  
89 chilling, as field conditions are too variable for this.

90

91 Using grapevine cuttings of five different cultivars (all *Vitis* interspecific hybrids), we supplied  
92 chilling using three different treatments: constant (5 °C), fluctuating (−3.5 °C, 6.5 °C, for 7h, 17h  
93 intervals daily), and field collected cuttings in Madison, WI, USA. When evaluating cold  
94 hardiness of the buds, we observed that the fluctuating treatment elicited a greater gain in cold  
95 hardiness over time compared to constant, while both were surpassed by buds subjected to much  
96 colder temperatures in the field (Fig. **1a**). After 2.5 months under treatments, some cuttings from  
97 constant and fluctuating treatments were reciprocally exchanged. Cold hardiness was again  
98 evaluated one month after the reciprocal exchange: field buds were still the most cold hardy,  
99 followed by all treatments which had been at any point exposed to fluctuating conditions, while  
100 buds that remained in the constant temperature treatment were the least cold hardy (Fig. **1b**,  
101 bottom). Cuttings from the same treatments, when placed under forcing conditions (22 °C,  
102 16h/8h day/night) for time to budbreak evaluation, demonstrate a similar, but opposite  
103 distribution: field collected cuttings take the longest to break bud, whereas constant temperature  
104 treated buds take the least amount of time (Fig. **1b**, top). Based on the observations of time to  
105 budbreak alone, the interpretation would be that the constant temperature treatment was the most  
106 effective in supplying chilling to buds, leading to shorter time to budbreak compared to  
107 fluctuating and field. However, even though exposure to all treatments reduced time to bud break  
108 by providing considerable chilling, the chilling effects in fluctuating and field treatments were  
109 diminished by the elongation of time to budbreak attributable to pronounced gains in cold  
110 hardiness.

111

112 The relationship between time to budbreak and cold hardiness provides us with additional  
113 information. A slope of about  $-0.5 \text{ day } ^\circ\text{C}^{-1}$  is observed when looking at the relationship of cold  
114 hardiness to time to budbreak (Fig. **1c**). This means that for every two additional degrees Celsius  
115 of cold hardiness, buds will take an additional day to break bud. The inverse of this slope is also  
116 useful: if we consider budbreak occurs at the end of the cold hardiness loss period, we can  
117 estimate a deacclimation rate of approximately  $2 \text{ } ^\circ\text{C day}^{-1}$  based on these data (approximately the  
118 maximum deacclimation rate reported by North et al. (2022) for the same cultivars). Here this is

119 measured at high levels of chill accumulation, after 3.5 months under chilling treatments, where  
 120 deacclimation responses are likely maximized. At low chilling accumulation, the slope in Fig. 1c  
 121 would presumably be higher due to lower deacclimation rates (Kovaleski et al., 2018; Kovaleski,  
 122 2022; North et al., 2022).  
 123

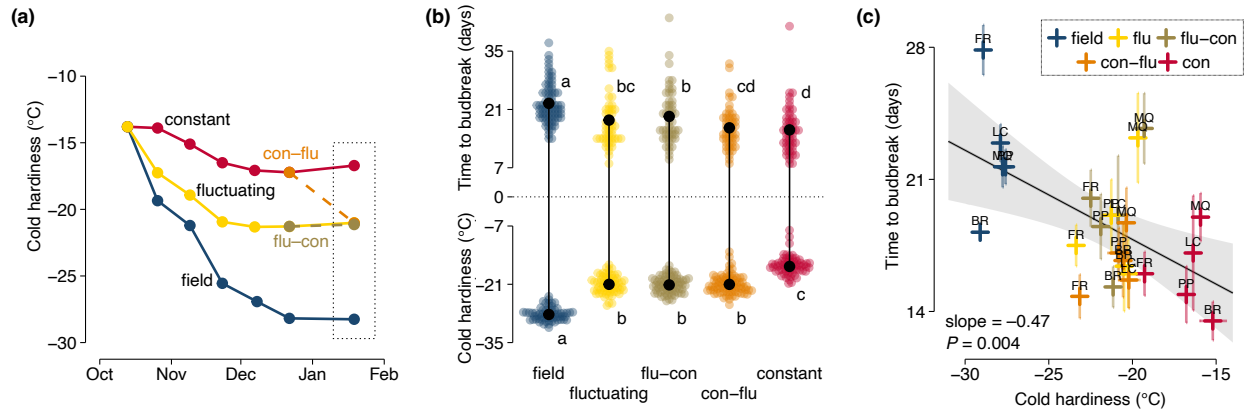

124  
 125 **Figure 1.** Cold hardiness and time to budbreak relations of grapevine buds in response to different  
 126 chilling treatments. Cuttings of five *Vitis* interspecific hybrid cultivars (‘Brianna’ – BR, ‘Frontenac’  
 127 – FR, ‘La Crescent’ – LC, ‘Marquette’ – MQ, ‘Petite Pearl’ – PP) were exposed to three different  
 128 chilling treatments: constant temperature (5 °C), fluctuating temperature (–3.5 °C, 6.5 °C, for 7h,  
 129 17h intervals daily), and field temperatures (in fall and winter of 2021-2022, Madison, WI, USA).  
 130 After 2.5 months under treatment, cuttings from the artificial chilling treatments were reciprocally  
 131 exchanged. (a) Cold hardiness of all original treatments was measured using 15 buds in bi-weekly  
 132 intervals until the exchange point, and a final cold hardiness measurement was performed one month  
 133 after the exchange. (b) Pairwise comparisons of cold hardiness and time to budbreak under forcing  
 134 conditions (22 °C, 16h/8h day/night) for all cultivars combined using Fishers LSD at  $\alpha = 0.05$ . (c)  
 135 Linear model showing a relationship between time to budbreak and cold hardiness of individual  
 136 cultivar samples. Standard error of observations is illustrated as semi-transparent extensions from  
 137 points horizontally (time to budbreak) and vertically (cold hardiness). See experiment description  
 138 in SI Materials and Methods.

139  
 140 This effect is not confined to *Vitis* spp.: buds of many other species, both angiosperms and  
 141 gymnosperms, deciduous and evergreen, gain cold hardiness during exposure to low  
 142 temperatures, particularly when negative temperatures are included in treatments [Fig. 2a; see  
 143 also hardening treatment in Vitra et al. (2017)]. The relevance of cold hardiness gains in relation

144 to time to budbreak depends on how much each species responds (Fig. **2b**) (where higher gains  
145 will have a greater effect) and how quickly any given species loses cold hardiness (see Box 1).  
146  
147 It is clear that low temperatures – particularly negative temperatures – in chilling treatments can  
148 lead to increases in cold hardiness (Fig. **1a,b** and Fig. **2a,b**), and by doing so can increase time to  
149 budbreak (Fig. **1b,c**). However, previous studies have not taken into consideration the effect of  
150 cold hardiness gains increasing time to budbreak. For example, Cragin and colleagues (2017)  
151 showed negative temperatures to contribute differently in the chilling accumulation of two  
152 grapevine genotypes:  $-3\text{ }^{\circ}\text{C}$  was more effective than  $0\text{ }^{\circ}\text{C}$  and  $3\text{ }^{\circ}\text{C}$  for ‘Chardonnay’, but the  
153 opposite for ‘Cabernet Sauvignon’. It is possible that the increases in rate of deacclimation  
154 elicited by chilling at the negative temperatures in ‘Cabernet Sauvignon’, which should lead to  
155 faster budbreak, was balanced by gains in cold hardiness, leading to a perceived delay in in time  
156 to budbreak (e.g., Box **1d**).  
157  
158 Baumgarten and colleagues (2021) showed that a high but sub-freezing temperature ( $-2\text{ }^{\circ}\text{C}$ ) does  
159 contribute to chilling of many forest species, though at different magnitudes. Notably, negative  
160 temperature treatments seemed to be more effective than many other low above freezing  
161 temperature treatments – consistent with findings for ‘Chardonnay’ by Cragin et al. (2017).  
162 Given the likely effect of the negative temperature eliciting greater gains in cold hardiness (e.g.,  
163 Fig. 2), it is possible that the effect of this treatment in providing chilling is underestimated there:  
164 if we account for the additional days taken to break bud because of the greater cold hardiness of  
165 buds, it may be that such temperatures are even more effective in providing chilling than what  
166 was estimated. Similarly, Rinne and colleagues (1997) applied short-term freezing treatments ( $-8$   
167  $^{\circ}\text{C}$ ,  $-16\text{ }^{\circ}\text{C}$ ,  $-24\text{ }^{\circ}\text{C}$ ,  $-32\text{ }^{\circ}\text{C}$ ) to *Betula pendula* seedlings during the dormant period. They  
168 observed a slight increase in days to budbreak (from four to eight weeks) before subsequent  
169 declines (from eight to twelve weeks). This could be explained by the simultaneous but  
170 competing effects between acclimation, which leads to increases in time to budbreak, and  
171 chilling accumulation, which leads to decreases in time to budbreak. In these non-exhaustive  
172 examples we speculate low temperatures are not only promoting dormancy transitions but are  
173 also promoting acclimation. However, these effects cannot be separated without cold hardiness  
174 measurements. Therefore, including cold hardiness measurements in future studies could clarify

175 our understanding of the range of temperatures promoting chilling and lead to improved chilling  
 176 and phenology models.

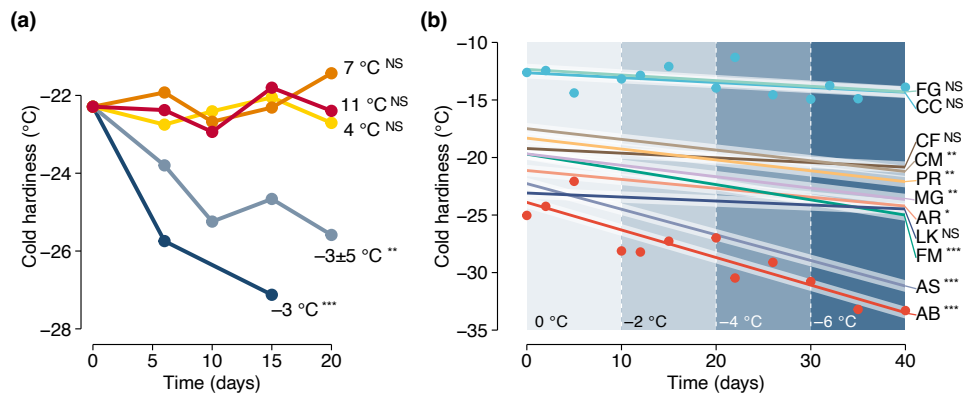

177

178

179

180

181

182

183

184

185

186

187

188

189

190

191

192

**Figure 2.** Cold hardiness changes in response to different temperature treatments for different ornamental and forest species. Changes in cold hardiness were analyzed using linear models in response to time. **(a)** Combined effect of temperature treatments on bud cold hardiness of *Acer platanoides*, *A. rubrum*, *A. saccharum*, *Cornus mas*, *Forsythia* ‘Meadowlark’, *Larix kaempferi*, *Metasequoia glyptostroboides*, *Picea abies*, *Prunus armeniaca*. Temperature treatments were constant -3 °C, 4 °C, 7 °C, 11 °C and fluctuating (-8 °C, -3 °C, 2°C, -3 °C for 6h intervals each: “-3±5 °C”). **(b)** Cuttings of eleven species were exposed to decreasing temperatures in -2 °C steps every 10 days from 0 °C to -6 °C. Linear responses are shown for all species, along with data points for two species: *Cercis canadensis* (CC) and *Abies balsamea* (AB). Other species include: FG – *Fagus grandifolia*; CF – *Cornus florida*; CM – *Cornus mas*; PR – *Prunus armeniaca*; MG – *Metasequoia glyptostroboides*; AR – *Acer rubrum*; LK – *Larix kaempferi*; AS – *Acer saccharum*. Asterisks indicate level of significance of slopes for linear models of cold hardiness in response to time in **(a)** and **(b)**: NS not significant; \* $P \leq 0.05$ ; \*\* $P \leq 0.01$ ; \*\*\* $P \leq 0.001$ . See experiment description in SI Materials and Methods.

193

194

195

196

197

198

199

200

201

Most phenological models only use combinations of chilling and forcing as temperature effects in their predictions (Wolkovich et al., 2012; Melaas et al., 2016; Vitasse et al., 2018; Ettinger et al., 2020; Zohner et al., 2020). Within the work of Melaas and colleagues (2016), it is interesting to note that the error in spring onset predictions follows a clear climatic gradient for many species, possibly indicating changes in cold hardiness along this gradient [though other genotypic differences can also play a role (Thibault et al., 2020)]. Recently, Wang and colleagues (2020) attempted to include a term for cold hardiness, but this resulted in no improvement over simpler models. However, they only compared “low” and “high” latitudes, dividing their dataset at 50.65° N. By doing so, the high latitude combined data from areas with



202 much milder climates, such as the British Isles, with data from much colder areas, such as the  
203 Nordic countries. While a division based on minimum observed temperatures might be a more  
204 sensible approach in modeling, it would possibly still not be enough given the dynamic nature of  
205 cold hardiness. It is also important to consider the duration of cold exposure based on  
206 incremental cold hardiness gains over time in artificial treatments (Fig. 1 and Fig. 2), something  
207 that is often acknowledged in field cold hardiness models (Aniško et al., 1994; Ferguson et al.,  
208 2011; Ferguson et al., 2014).

209

210 Cold hardiness and dormancy are thus intrinsically connected. In particular, dormancy  
211 establishment (or at least growth cessation) precludes significant acclimation (Tanino et al.,  
212 2010). Similar low temperatures promote gains in cold hardiness and chilling accumulation (Fig.  
213 **3a**). Increasing chill accumulation leads to increases in rates of cold deacclimation (Kovaleski et  
214 al., 2018; North et al., 2022; Kovaleski, 2022). Given these overlaps, could chilling and  
215 acclimation both be part of the same process? A correlation between both has been previously  
216 suggested (Wolf and Cook, 1992; Cragin et al., 2017). However, here we argue that although  
217 intrinsically connected, these are separate processes that can be (mathematically) separated with  
218 complete datasets (i.e., those including cold hardiness and time to budbreak). The correlation  
219 between cold hardiness and deacclimation rate is spurious, as seen using a large dataset  
220 comprised of weekly evaluations of both for many different species (Kovaleski, 2022; Fig. **3b,c**).  
221 During fall and early winter, when cold hardiness has not reached its maximum, both cold  
222 hardiness and deacclimation rate increase, suggesting such correlation to be true. Once a  
223 maximum cold hardiness is reached for a given species {in about December for many species  
224 and maintained throughout winter [see Ferguson et al. (2011), Londo and Kovaleski (2017),  
225 North et al. (2021), Kovaleski (2022)]}, only the rate of deacclimation continues to increase in  
226 response to chilling accumulation. For some species that were evaluated throughout losing their  
227 field cold hardiness in early spring (*Acer rubrum* and *Cercis canadensis* in Fig. **3b**), we can  
228 observe that the rate of deacclimation can continue to increase even as the cold hardiness begins  
229 to decrease in the spring. Therefore, simply measuring the cold hardiness of buds does not say  
230 much about their dormancy state (or time to budbreak).

231

232



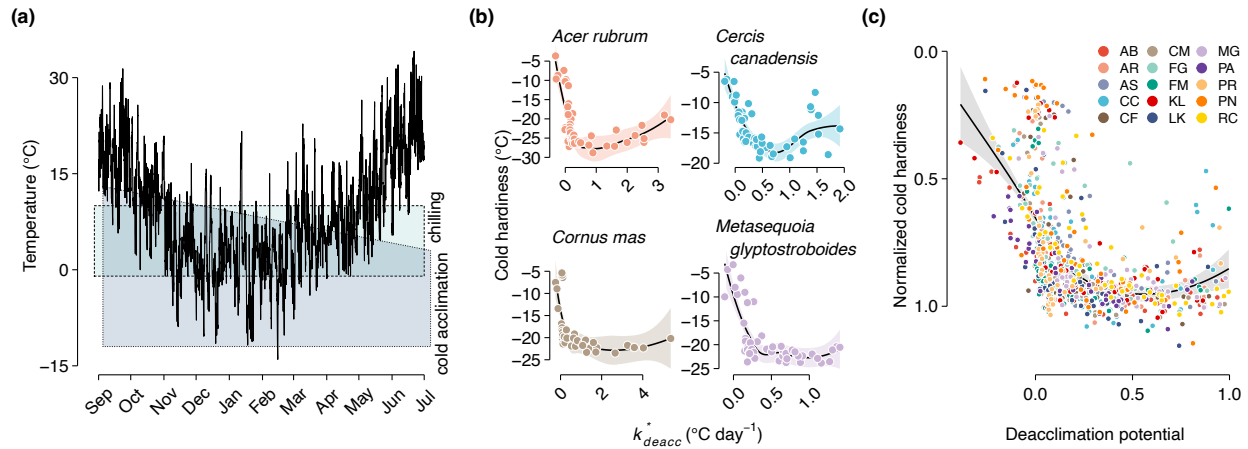

233

234

235

236

237

238

239

240

241

242

243

244

245

**Figure 3.** Cold hardiness and deacclimation rate are affected by low temperatures during the winter (data from Kovaleski, 2022). (a) Temperatures during 2019-2020 season in Boston, MA, USA, with overlaid effects of presumed temperatures eliciting chilling accumulation and cold acclimation responses. (b) Absolute values of cold hardiness and effective rate of deacclimation ( $k_{deacc}^*$ ) for four species of woody perennials. (c) Normalized values of cold hardiness and rate of deacclimation (dubbed deacclimation potential (Kovaleski et al., 2018)) for 15 species of woody perennials. AB – *Abies balsamea*; AR – *Acer rubrum*; AS – *Acer saccharum*; CC – *Cercis canadensis*; CF – *Cornus florida*; CM – *Cornus mas*; FG – *Fagus grandifolia*; FM – *Forsythia* ‘Meadowlark’; KL – *Kalmia latifolia*; LK – *Larix kaempferi*; MG – *Metasequoia glyptostroboides*; PA – *Picea abies*; PR – *Prunus armeniaca*; PN – *Prunus nigra*; RC – *Rhododendron calendulaceum*. Adapted from Kovaleski (2022).

246

247

248

249

250

251

252

253

254

255

256

257

Cold hardiness is therefore not a substitute for time to budbreak. To understand effects of chilling temperatures on dormancy, either (i) cold hardiness measurements must be attached to time to budbreak or (ii) deacclimation rates should be used. Considering budbreak is the culminating phenological event at the end of the dormant season, and useful in modeling, perhaps all three should be evaluated at once. Budbreak is an important phenological status when it comes to freeze risks of native vegetation and crops, which may benefit from protection. In addition, budbreak is easily observed, requiring no special equipment and thus allowing for field data collection by citizen science projects with much higher reach in terms of locations and number of individuals and species than would be possible if only done by scientists [e.g., Nature’s Notebook (Posthumus and Crimmins, 2011) within the USA National Phenology Network ([www.usanpn.org](http://www.usanpn.org)), iNaturalist ([www.inaturalist.org](http://www.inaturalist.org)), and Pan European Phenological database (PEP 725; Templ et al., 2018)]. At the same time, however helpful extensive spring

258 phenology datasets may be, thoughtful consideration must be made in experimental settings  
259 where detailed phenotyping is possible.

260

## 261 **Conclusions**

262

263 Despite evidence presented here, some might still consider cold hardiness and dormancy to be a  
264 part of the same process. And differences in opinion are fertile ground for scientific innovation –  
265 something that appears needed for advances in dormancy research. Regardless, we believe to  
266 have shown direct and clear evidence here that future research in dormancy and spring  
267 phenology – be that in artificial or natural conditions – would benefit from including cold  
268 hardiness evaluation in their study designs. While we make a case for the effect of temperatures  
269 of chilling affecting cold hardiness, it is possible that any environmental effect that affects  
270 budbreak phenology {e.g., water (Hajek and Knapp, 2022), light [either photoperiod (Körner and  
271 Basler, 2010) or radiation (Vitasse et al., 2021)], and interactions (see Peaucelle et al., 2022)}  
272 may be doing so through affecting cold hardiness as well as dormancy. It is true that evaluation  
273 of cold hardiness of buds in dormancy studies may be more consequential in some species than  
274 others, but cold hardiness is, to our knowledge, always an intrinsic part of budbreak phenology.  
275 The full impact of acknowledging cold hardiness of buds may only be understood as more data is  
276 generated. We expect that this will not only help but will be crucial in elucidating aspects of  
277 dormancy mechanisms, as well as helping phenological modeling efforts.

278

279

280 **Box 1. Current understanding of cold hardiness dynamics and its effect on time to**  
281 **budbreak**

282  
283 Most cold hardiness is lost upon budbreak (Lenz et al., 2013; Vitra et al., 2017; Kovaleski et al.,  
284 2018; Kovaleski, 2022), but the amount of cold hardiness and how it is lost can affect timing of  
285 budbreak. Examples here are based on extensive phenotyping of plants that use supercooling as a  
286 mechanism of cold hardiness, but we expect a similar dynamic for plants that use other  
287 mechanisms (Neuner et al., 2019; Villouta et al., 2020). Under forcing (i.e., exposure to warm  
288 temperatures and generally long days), supercooling ability is lost linearly, without changes in  
289 external morphology (Box 1a) [but internal anatomical and morphological changes occur  
290 (Viherä-Aarnio et al., 2014; Xie et al., 2018; Kovaleski et al., 2019; Villouta et al., 2022)]. As  
291 growth resumes, the supercooling ability has been lost and concentration mostly drives cold  
292 hardiness of tissues. The minimum cold hardiness is thus observed at budbreak and early leafout  
293 (Chamberlain et al., 2019), when influx of water driving turgor of tissues leading to budbreak  
294 prior to influx of carbohydrates decreases concentration of tissues to a minimum. The relative  
295 alignment of these factors may vary based on a given definition of budbreak and/or  
296 morphological differences across species (Lancashire et al., 1991; Finn et al., 2007).

297  
298 The supercooling ability is lost linearly relative to time under forcing conditions at a given  
299 temperature for many species (Kovaleski et al., 2018; Kovaleski, 2022; North et al., 2022). Here,  
300 this is illustrated conceptually using an orthogonal triangle. The time to budbreak is the base of  
301 the triangle, and the cold hardiness is the height of the triangle. The deacclimation rate (rate of  
302 cold hardiness loss) thus becomes the angle of the hypotenuse to the base of the triangle.

303 Mathematically, these relations are represented by the following equation:

304 
$$\text{Time to Budbreak} = \frac{|CH_0 - CH_{BB}|}{k_{deacc}^*}$$
 (from Kovaleski, 2022),

305 where  $CH_0$  is the initial cold hardiness,  $CH_{BB}$  is the cold hardiness at budbreak,  $k_{deacc}^*$  is the  
306 effective rate of deacclimation (a function of both temperature in which deacclimation is  
307 occurring and chill accumulation). Three scenarios are explored here where variations in cold  
308 hardiness and deacclimation rate affect timing of budbreak.

309

310 In the first example (Box **1b**), buds have the same initial cold hardiness, but deacclimate at  
311 different rates (red has higher rate than blue), thus leading to different times to budbreak (earlier  
312 for red than for blue). This may be caused by different levels of chill accumulation within the  
313 same species (or same genotype within a species), or different species at the same chill  
314 accumulation where one has inherently faster deacclimation rate. If these are the same genotype,  
315 the different rates mean that the buds are at different dormancy states.

316

317 In the second example (Box **1c**), buds have different initial cold hardiness (blue is more cold  
318 hardy than yellow), but deacclimate at the same rate. This could happen if buds are collected  
319 from the same genotype, at the same chill accumulation, but some buds were exposed to lower  
320 temperatures, leading to greater cold acclimation. A scenario where this could occur is buds  
321 collected in different locations, where one has lower minimum temperatures than the other.  
322 These being the same genotype, having the same deacclimation rate means the buds are at the  
323 same dormancy state, regardless of the difference in time to budbreak.

324

325 In the third example (Box **1d**), both initial cold hardiness and deacclimation rate are different  
326 (red is more cold hardy and has higher rate of deacclimation compared to yellow). Despite these  
327 differences, budbreak occurs at the same time. For the same genotype, this could be observed  
328 with less cold hardy buds in the fall, breaking bud in the same amount of time as buds collected  
329 in mid-winter which are more cold hardy, but lose that cold hardiness faster due to more chill  
330 accumulation. Although budbreak is happening at the same time, the buds are likely at different  
331 dormancy states.

332

333 In field conditions, bud cold hardiness follows a U-shaped pattern throughout the dormant  
334 period, while deacclimation rate increases in a sigmoid shape. When these two are combined, we  
335 find that observations of forcing experiments follow a certain pattern: time to budbreak increases  
336 slightly in fall where cold hardiness is increasing, but deacclimation rate has not yet significantly  
337 increased; this is followed by a period where cold hardiness stops increasing, and bud  
338 deacclimation rate rapidly increases, thus leading to decreases in time to budbreak; and finally, a  
339 period where deacclimation rate is no longer increasing (chilling is maximized), and cold  
340 hardiness starts to decrease.

341

342 These scenarios highlight the importance of a dormancy phenotype that integrates cold hardiness  
 343 and deacclimation. Budbreak phenotyping alone overlooks important physiological differences  
 344 associated with dormancy. In some cases, an integrated phenotype will support the interpretation  
 345 of differing dormancy status based on budbreak but will enhance the extent of differences. In  
 346 other cases, an integrated phenotype could greatly contradict interpretations of dormancy status  
 347 based on budbreak.

348

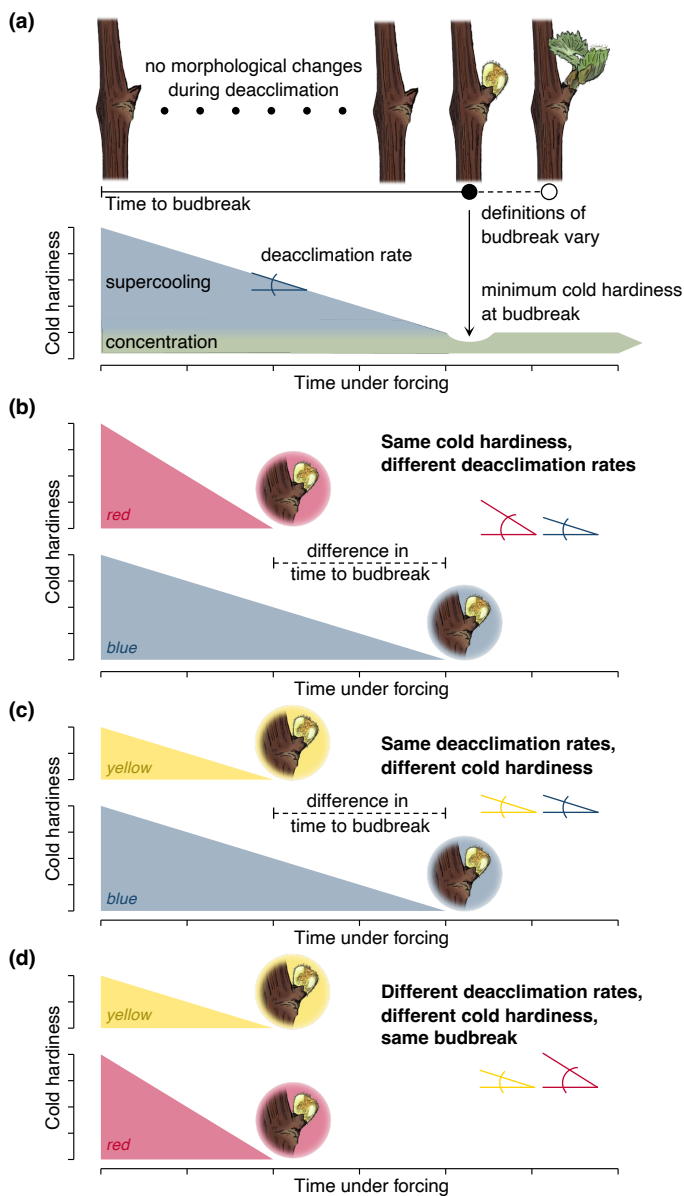

**Fig. Box 1.** The time to budbreak is affected by degree of cold hardiness and deacclimation rate, as budbreak occurs once supercooling ability is lost. (a) In many species, cold hardiness of buds is determined by supercooling ability and cellular concentration. Upon budbreak, supercooling ability has been lost, and cold hardiness is minimal as concentration drops due to high turgor of tissues, with some being recovered as tissues mature. (b–d) Different scenarios are presented where: *initial cold hardiness* is the same for blue and red triangles, but lower for yellow triangles; *deacclimation rates* are the same for blue and yellow triangles, but greater for red triangles; and in combination resulting in *time to budbreak* being the same for yellow and red triangles, but greater for the blue triangle.

349

350 **Acknowledgements**

351 We thank [names to be added post-review] for comments on drafts; the Arnold Arboretum of  
352 Harvard University for access to the living collections; and A. Atucha and the West Madison  
353 Agricultural Research Station for access to vineyards. Support for this research was provided by  
354 the Office of the Vice Chancellor for Research and Graduate Education at the University of  
355 Wisconsin–Madison with funding from the Wisconsin Alumni Research Foundation and the  
356 Putnam Fellowship Program of the Arnold Arboretum.

357

358

359 **Author contributions**

360 MGN and APK designed research, performed research, analyzed data, wrote the manuscript.

361

362 **Figure Legends**

363

364 **Figure 1.** Cold hardiness and time to budbreak relations of grapevine buds in response to  
365 different chilling treatments. Cuttings of five *Vitis* interspecific hybrid cultivars (‘Brianna’ – BR,  
366 ‘Frontenac’ – FR, ‘La Crescent’ – LC, ‘Marquette’ – MQ, ‘Petite Pearl’ – PP) were exposed to  
367 three different chilling treatments: constant temperature (5 °C), fluctuating temperature (–3.5 °C,  
368 6.5 °C, for 7h, 17h intervals daily), and field temperatures (in fall and winter of 2021–2020,  
369 Madison, WI, USA). After 2.5 months under treatment, cuttings from the artificial chilling  
370 treatments were reciprocally exchanged. **(a)** Cold hardiness of all original treatments was  
371 measured using 15 buds in bi-weekly intervals until the exchange point, and a final cold  
372 hardiness measurement was performed one month after the exchange. **(b)** Pairwise comparisons  
373 of cold hardiness and time to budbreak under forcing conditions (22 °C, 16h/8h day/night) for all  
374 cultivars combined using Fishers LSD at  $\alpha = 0.05$ . **(c)** Linear model showing a relationship  
375 between time to budbreak and cold hardiness of individual cultivar samples. Standard error of  
376 observations is illustrated as semi-transparent extensions from points horizontally (time to  
377 budbreak) and vertically (cold hardiness).

378

379 **Figure 2.** Cold hardiness changes in response to different temperature treatments for different  
380 ornamental and forest species. Changes in cold hardiness were analyzed using linear models in  
381 response to time. **(a)** Combined effect of temperature treatments on bud cold hardiness of *Acer*  
382 *platanoides*, *A. rubrum*, *A. saccharum*, *Cornus mas*, *Forsythia* ‘Meadowlark’, *Larix kaempferi*,  
383 *Metasequoia glyptostroboides*, *Picea abies*, *Prunus armeniaca*. Temperature treatments were  
384 constant –3 °C, 4 °C, 7 °C, 11 °C and fluctuating (–8 °C, –3 °C, 2°C, –3 °C for 6h intervals each:  
385 “–3±5 °C”). **(b)** Cuttings of eleven species were exposed to decreasing temperatures in –2 °C  
386 steps every 10 days from 0 °C to –6 °C. Linear responses are shown for all species, along with  
387 data points for two species: *Cercis canadensis* (CC) and *Abies balsamea* (AB). Other species  
388 include: FG – *Fagus grandifolia*; CF – *Cornus florida*; CM – *Cornus mas*; PR – *Prunus*  
389 *armeniaca*; MG – *Metasequoia glyptostroboides*; AR – *Acer rubrum*; LK – *Larix kaempferi*; AS  
390 – *Acer saccharum*. Asterisks indicate level of significance of slopes in **(a)** and **(b)**: <sup>NS</sup>not  
391 significant; \* $P \leq 0.05$ ; \*\* $P \leq 0.01$ ; \*\*\* $P \leq 0.001$ .

392



393 **Figure 3.** Cold hardiness and deacclimation rate are affected by low temperatures during the  
394 winter (data from Kovaleski, 2022). **(a)** Temperatures during 2019-2020 season in Boston, MA,  
395 USA, with overlaid effects of presumed temperatures eliciting chilling accumulation and cold  
396 acclimation responses. **(b)** Absolute values of cold hardiness and effective rate of deacclimation  
397 ( $k_{deacc}^*$ ) for four species of woody perennials. **(c)** Normalized values of cold hardiness and rate  
398 of deacclimation (dubbed deacclimation potential (Kovaleski et al., 2018)) for 15 species of  
399 woody perennials. AB – *Abies balsamea*; AR – *Acer rubrum*; AS – *Acer saccharum*; CC –  
400 *Cercis canadensis*; CF – *Cornus florida*; CM – *Cornus mas*; FG – *Fagus grandifolia*; FM –  
401 *Forsythia* ‘Meadowlark’; KL – *Kalmia latifolia*; LK – *Larix kaempferi*; MG – *Metasequoia*  
402 *glyptostroboides*; PA – *Picea abies*; PR – *Prunus armeniaca*; PN – *Prunus nigra*; RC –  
403 *Rhododendron calendulaceum*.

404  
405 **Fig. Box 1.** The time to budbreak is affected by degree of cold hardiness and deacclimation rate,  
406 as budbreak occurs once supercooling ability is lost. (a) In many species, cold hardiness of buds  
407 is determined by supercooling ability and cellular concentration. Upon budbreak, supercooling  
408 ability has been lost, and cold hardiness is minimal as concentration drops due to high turgor of  
409 tissues, with some being recovered as tissues mature. (b–d) Different scenarios are presented  
410 where: *initial cold hardiness* is the same for blue and red triangles, but lower for yellow  
411 triangles; *deacclimation rates* are the same for blue and yellow triangles, but greater for red  
412 triangles; and in combination resulting in *time to budbreak* being the same for yellow and red  
413 triangles, but greater for the blue triangle.

414  
415  
416  
417

418 **References**

419

420 **Alvarez HC, Salazar-Gutiérrez M, Zapata D, Keller M, Hoogenboom G. 2018.** Time-to-  
421 event analysis to evaluate dormancy status of single-bud cuttings: an example for grapevines.  
422 *Plant Methods* **14**: 94.

423

424 **Aniško T, Lindstrom OM, Hoogenboom G. 1994.** Development of a cold hardiness model for  
425 deciduous woody plants. *Physiologia Plantarum* **91**: 375–382.

426

427 **Baumgarten F, Zohner CM, Gessler A, Vitasse Y. 2021.** Chilled to be forced: the best dose to  
428 wake up buds from winter dormancy. *New Phytologist* **230**: 1366–1377.

429

430 **Chamberlain CJ, Cook BI, Cortázar-Atauri IG, Wolkovich EM. 2019.** Rethinking false  
431 spring risk. *Global Change Biology* **25**: 2209–2220.

432

433 **Chen M, Melaas EK, Gray JM, Friedl MA, Richardson AD. 2016.** A new seasonal-deciduous  
434 spring phenology submodel in the Community Land Model 4.5: impacts on carbon and water  
435 cycling under future climate scenarios. *Global Change Biology* **22**: 3675–3688.

436

437 **Cooke JEK, Eriksson ME, Junttila O. 2012.** The dynamic nature of bud dormancy in trees:  
438 environmental control and molecular mechanisms. *Plant, Cell and Environment* **35**: 1707–1728.

439

440 **Coville F. 1920.** The influence of cold in stimulating the growth of plants. *Proceedings of the*  
441 *National Academy of Sciences of the United States of America* **6**: 434–435.

442

443 **Cragin J, Serpe M, Keller M, Shellie K. 2017.** Dormancy and cold hardiness transitions in  
444 winegrape cultivars Chardonnay and Cabernet Sauvignon. *American Journal of Enology and*  
445 *Viticulture* **68**: 195–202.

446

- 447 **Ettinger AK, Chamberlain CJ, Morales-Castilla I, Buonaiuto DM, Flynn DFB, Savas T,**  
448 **Samaha JA, Wolkovich EM. 2020.** Winter temperatures predominate in spring phenological  
449 responses to warming. *Nature Climate Change* **10**: 1137–1142.
- 450
- 451 **Ferguson JC, Tarara JM, Mills LJ, Grove GG, Keller M. 2011.** Dynamic thermal time model  
452 of cold hardiness for dormant grapevine buds. *Annals of Botany* **107**: 389–396.
- 453
- 454 **Ferguson JC, Moyer MM, Mills LJ, Hoogenboom G, Keller M. 2014.** Modeling dormant bud  
455 cold hardiness and budbreak in twenty-three *Vitis* genotypes reveals variation by region of  
456 origin. *American Journal of Enology and Viticulture* **65**: 59–71.
- 457
- 458 **Finn GA, Straszewski AE, Peterson V. 2007.** A general growth stage key for describing trees  
459 and woody plants. *Annals of Applied Biology* **151**: 127–131.
- 460
- 461 **Flynn DFB, Wolkovich EM. 2018.** Temperature and photoperiod drive spring phenology across  
462 all species in a temperate forest community. *New Phytologist* **219**: 1353–1362.
- 463
- 464 **Hajek OL, Knapp AK. 2021.** Shifting seasonal patterns of water availability: ecosystem  
465 responses to an unappreciated dimension of climate change. *New Phytologist* **233**: 119–125.
- 466
- 467 **Knight, TA. 1801.** XV. Account of some experiments on the ascent of the sap in trees. In a letter  
468 from Thomas Andrew Knight, Esq. to the Right Hn. Sir Joseph Banks, Bart. K. B. P. R. S.  
469 *Philosophical Transactions of the Royal Society of London* **91**: 333–353.
- 470
- 471 **Körner C, Basler D. 2010.** Phenology under global warming. *Science* **327**: 1461–1462.
- 472
- 473 **Kovaleski AP. 2022.** Woody species do not differ in dormancy progression: differences in time  
474 to budbreak due to forcing and cold hardiness. *Proceedings of the National Academy of Sciences*  
475 *of the United States of America* **119**: e2112250119.
- 476

- 477 **Kovaleski AP, Londo JP, Finkelstein KD. 2019.** X-ray phase contrast imaging of *Vitis* spp.  
478 buds shows freezing pattern and correlation between volume and cold hardiness. *Scientific*  
479 *Reports* **9**: 14949.
- 480
- 481 **Kovaleski AP, Reisch BI, Londo JP. 2018.** Deacclimation kinetics as a quantitative phenotype  
482 for delineating the dormancy transition and thermal efficiency for budbreak in *Vitis* species. *AoB*  
483 *Plants* **10**: ply066.
- 484
- 485 **Lancashire P.D., Bleiholder H., Van Den Boom T., Langelüddeke P., Stauss R., Weber E.,**  
486 **Witzenberger A. 1991.** An uniform decimal code for growth stages of crops and weeds. *Annals*  
487 *of Applied Biology* **119**: 561–601.
- 488
- 489 **Lang GA, Early JD, Martin GC, Darnell RL. 1987.** Endo-, Para-, and Ecodormancy:  
490 physiological terminology and classification for dormancy research. *HortScience* **22**: 371–377.
- 491
- 492 **Lenz A, Hoch G, Vitasse Y, Körner C. 2013.** European deciduous trees exhibit similar safety  
493 margins against damage by spring freeze events along elevational gradients. *New Phytologist*  
494 **200**: 1166–1175.
- 495
- 496 **Londo JP, Johnson LM. 2014.** Variation in the chilling requirement and budburst rate of wild  
497 *Vitis* species. *Environmental and Experimental Botany* **106**: 138–147.
- 498
- 499 **Londo JP, Kovaleski AP. 2017.** Characterization of wild North American grapevine cold  
500 hardiness using differential thermal analysis. *American Journal of Enology and Viticulture* **68**:  
501 203–212.
- 502
- 503 **Luedeling E, Brown PH. 2011.** A global analysis of the comparability of winter chill models for  
504 fruit and nut trees. *International Journal of Biometeorology* **55**: 411–421.
- 505
- 506 **Melaas EK, Friedl MA, Richardson AD. 2016.** Multiscale modeling of spring phenology  
507 across deciduous forests in the Eastern United States. *Global Change Biology* **22**: 792–805.

508

509 **Neuner G, Monitzer K, Kaplenig D, Ingruber J. 2019.** Frost survival mechanism of vegetative  
510 buds in temperate trees: deep supercooling and extraorgan freezing vs. ice tolerance. *Frontiers in*  
511 *Plant Science* **10**: 537.

512

513 **North M, Workmaster BA, Atucha A. 2021.** Cold hardiness of cold climate interspecific  
514 hybrid grapevines grown in a cold climate region. *American Journal of Enology and Viticulture*  
515 **72**: 318–327.

516

517 **North M, Workmaster BA, Atucha A. 2022.** Effects of chill unit accumulation and  
518 temperature on woody plant deacclimation kinetics. *Physiologia Plantarum* **174**: e13717.

519

520 **Peaucelle M, Peñuelas J, Verbeeck H. 2022.** Accurate phenology analyses requires bud traits  
521 and energy budgets. *Nature Plants* **8**: 915–922.

522

523 **Posthumus E, Crimmins T. 2011.** Nature’s Notebook: a tool for education and research.  
524 *Bulletin of the Ecological Society of America* **92**: 185–187.

525

526 **Richardson AD, Anderson RS, Arain MA, Barr AG, Bohrer G, Chen G, Chen J, Ciais P,**  
527 **Davis KJ, Desai AR, et al. 2012.** Terrestrial biosphere models need better representation of  
528 vegetation phenology: results from the North American Carbon Program Site Synthesis. *Global*  
529 *Change Biology* **18**: 566–584.

530

531 **Rinne P, Hänninen H, Kaikuranta P, Jalonen JE, Repo T. 1997.** Freezing exposure releases  
532 bud dormancy in *Betula pubescens* and *B. pendula*. *Plant, Cell and Environment* **20**: 1199-1204.

533

534 **Tanino KK, Kalcsits L, Silim S, Kendall E, Gray GR. 2010.** Temperature-driven plasticity in  
535 growth cessation and dormancy development in deciduous woody plants: a working hypothesis  
536 suggesting how molecular and cellular function is affected by temperature during dormancy  
537 induction. *Plant Molecular Biology* **73**: 49–65.

538

- 539 **Templ B, Koch E, Bolmgren K, Ungersböck M, Paul A, Scheifinger H, Rutishauser T,**  
540 **Busto M, Chmielewski F-M, Hájková L, et al. 2018.** Pan European Phenological database  
541 (PEP725): a single point of access for European data. *International Journal of Biometeorology*  
542 **62:** 1109–1113.
- 543  
544 **Thibault E, Soolanayakanahally R, Keller SR. 2020.** Latitudinal clines in bud flush phenology  
545 reflect genetic variation in chilling requirements in balsam poplar, *Populus balsamifera*.  
546 *American Journal of Botany* **107:** 1597–1605.
- 547  
548 **Viherä-Aarnio A, Sutinen S, Partanen J, Häkkinen R. 2014.** Internal development of  
549 vegetative buds of Norway spruce trees in relation to accumulated chilling and forcing  
550 temperatures. *Tree Physiology* **34:** 547–556.
- 551  
552 **Villouta C, Workmaster BA, Bolivar-Medina J, Sinclair S, Atucha A. 2020.** Freezing stress  
553 survival mechanisms in *Vaccinium macrocarpon* Ait. terminal buds. *Tree physiology* **40:** 841–  
554 855.
- 555  
556 **Villouta C, Workmaster BA, Livingston III DP, Atucha A. 2022.** Acquisition of freezing  
557 tolerance in *Vaccinium macrocarpon* Ait. is a multi-factor process involving the presence of an  
558 ice barrier at the bud base. *Frontiers in Plant Science* **13:** 891488.
- 559  
560 **Vitasse Y, Signarbieux C, Fu YH. 2018.** Global warming leads to more uniform spring  
561 phenology across elevations. *Proceedings of the National Academy of Sciences of the United*  
562 *States of America* **115:** 1004:1008.
- 563  
564 **Vitasse Y, Baumgarten F, Zohner CM, Kaewthongrach R, Fu YH, Walde MG, Moser B.**  
565 **2021.** Impact of microclimatic conditions and resource availability on spring and autumn  
566 phenology of temperate tree seedlings. *New Phytologist* **232:** 537–550.
- 567  
568 **Vitra A, Lenz A, Vitasse Y. 2017.** Frost hardening and dehardening potential in temperate trees  
569 from winter to budburst. *New Phytologist* **216:** 113–123.

570

571 **Wang H, Wu C, Ciais P, Penuelas J, Dai J, Fu Y, Ge Q. 2020.** Overestimation of the effect of  
572 climatic warming on spring phenology due to misrepresentation of chilling. *Nature*  
573 *Communications* **11**: 4945.

574

575 **Wolf TK, Cook MK. 1992.** Seasonal deacclimation patterns of three grape cultivars at constant,  
576 warm temperature. *American Journal of Enology and Viticulture* **43**: 171–179.

577

578 **Wolkovich EM, Cook BI, Allen JM, Crimmins TM, Betancourt JL, Traverse SE, Pau S,**  
579 **Regetz J, Davies TJ, Kraft NJB, et al. 2012.** Warming experiments underpredict plant  
580 phenological responses to climate change. *Nature* **485**: 491–497.

581

582 **Xie Z, Forney CF, Bondada B. 2018.** Renewal of vascular connections between grapevine buds  
583 and canes during bud break. *Scientia Horticulturae* **233**: 331–338.

584

585 **Yamane H, Singh AK, Cooke JEK. 2021.** Plant dormancy research: from environmental  
586 control to molecular regulatory networks. *Tree Physiology* **41**: 523–528.

587

588 **Zohner CM, Mo L, Pugh TAM, Bastin J-F, Crowther TW. 2020.** Interactive climate factors  
589 restrict future increases in spring productivity of temperate and boreal trees. *Global Change*  
590 *Biology* **26**: 4042–4055.

591

592

593
